# Supplementary material for: Synthesis, nonlinear optical analysis and DFT studies of D–π–D and A–π–A configured Schiff bases derived from bis-phenylenediamine
Source: Royal Society of Chemistry journal article supplement (doi:10.1039/d2ra05844h), 2022-01-01
Supplement: d2ra05844h1.pdf [file d2ra05844h1.pdf]

**Synthesis, Nonlinear Optical Analysis and DFT Studies of D- $\pi$ -D and A- $\pi$ -A Configured Schiff bases derived from Bis-phenylenediamine**

Rabia Farooq<sup>1</sup>, Zahra Batool<sup>1</sup>, Muhammad Khalid<sup>2,3\*</sup>, Muhammad Usman Khan<sup>4</sup>, Ataulpa Albert Carmo Braga<sup>5</sup>, Ahmed H. Ragab<sup>6</sup>, Saedah R. Al-Mhyawi<sup>7</sup>, Gulzar Muhammad<sup>8</sup> and Zahid Shafiq<sup>1\*</sup>

<sup>1</sup>*Institute of Chemical Sciences, Bahauddin Zakariya University, Multan-60800, Pakistan*

<sup>2</sup>*Department of Chemistry, Khwaja Fareed University of Engineering & Information Technology, Rahim Yar Khan, 64200, Pakistan*

<sup>3</sup>*Centre for Theoretical and Computational Research, Khwaja Fareed University of Engineering & Information Technology, Rahim Yar Khan, 64200, Pakistan*

<sup>4</sup>*Department of Chemistry, University of Okara, Okara-56300, Pakistan*

<sup>5</sup>*Departamento de Química Fundamental, Instituto de Química, Universidade de São Paulo, Av. Prof. Lineu Prestes 748, São Paulo, 05508-000, Brazil*

<sup>6</sup>*Department of Chemistry, Faculty of Science, King Khalid University, Abha 62224, Saudi Arabia*

<sup>7</sup>*Department of Chemistry, College of Science, University of Jeddah, Jeddah 21419, Saudi Arabia*

<sup>8</sup>*Department of Chemistry, Government College University Lahore, Lahore, Pakistan*

Prof. Dr. Zahid Shafiq: [zahidshafiq@bzu.edu.pk](mailto:zahidshafiq@bzu.edu.pk)

Dr. Muhammad Khalid: [khalid@iq.usp.br](mailto:khalid@iq.usp.br); [mohammad.khalid@kfueit.edu.pk](mailto:mohammad.khalid@kfueit.edu.pk)

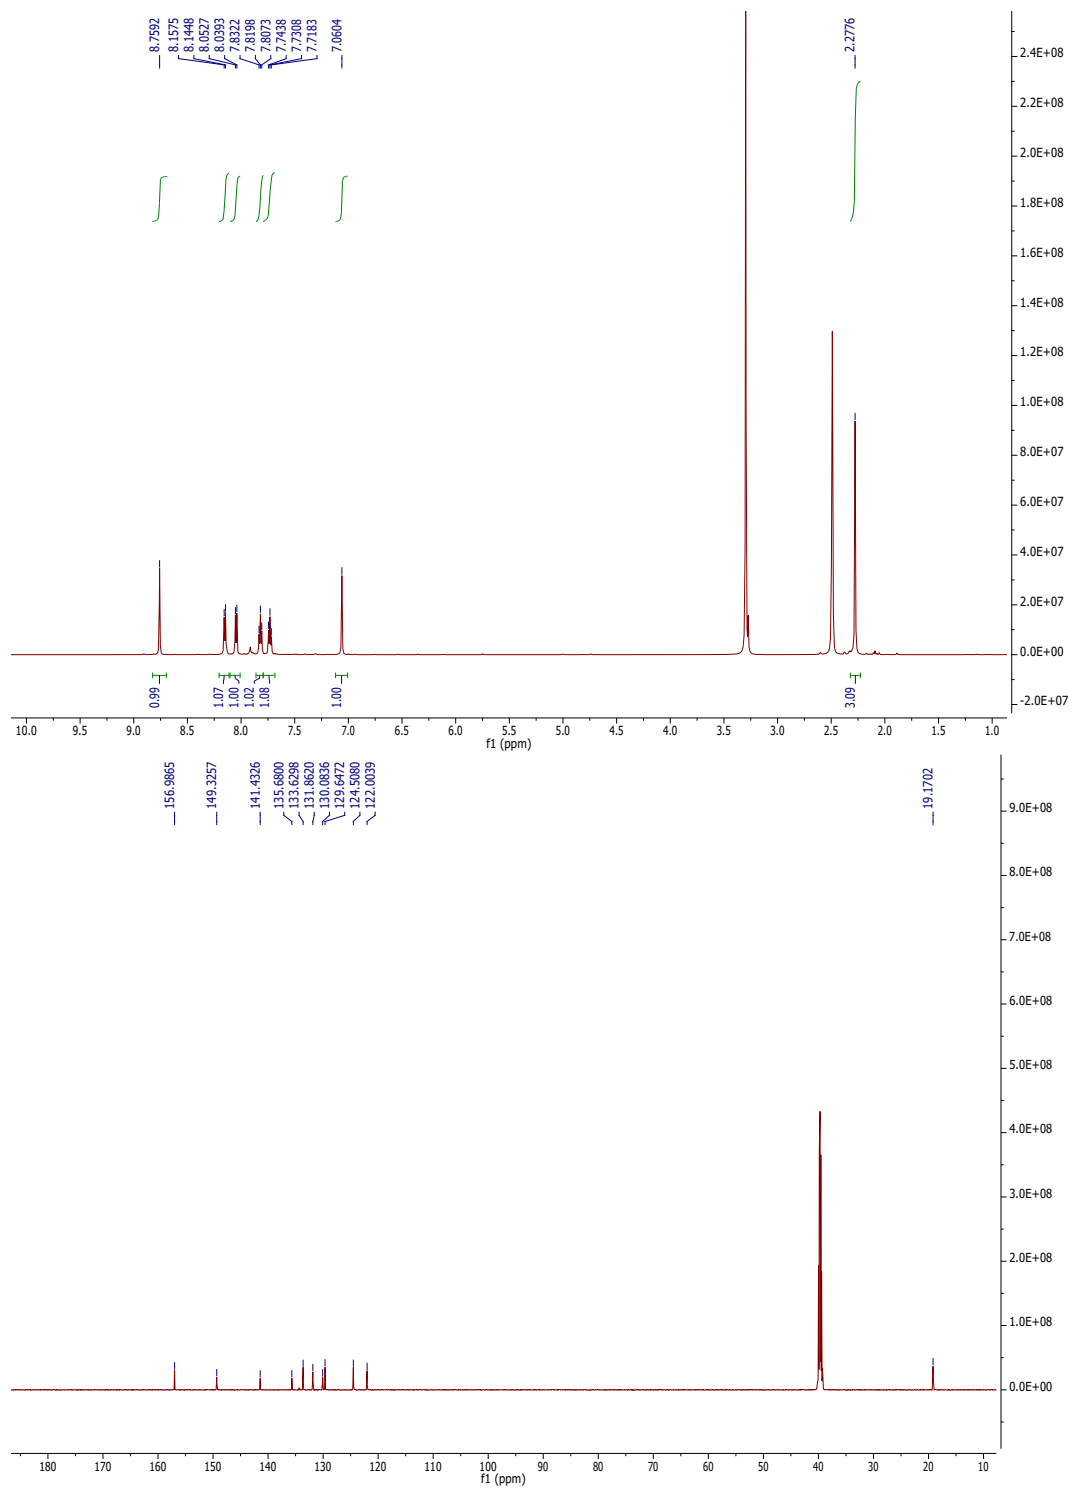

Figure S1:  $^1\text{H}$  &  $^{13}\text{C}$  NMR spectrum of DMA

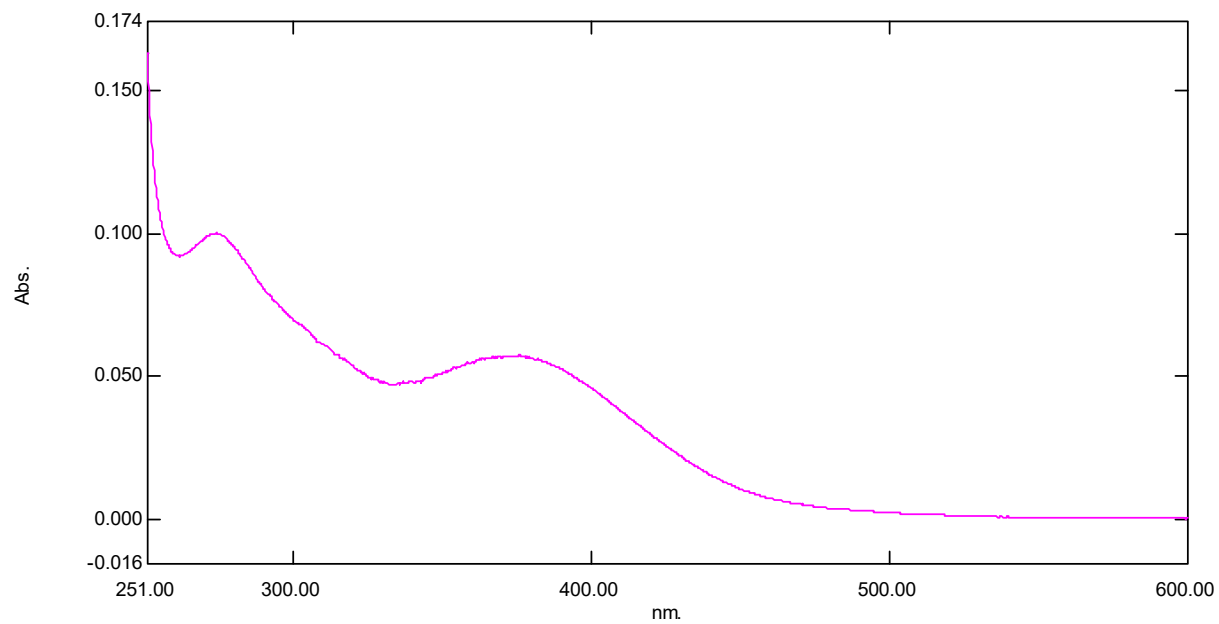

**Figure S2:** UV spectrum of **DMA** in acetonitrile

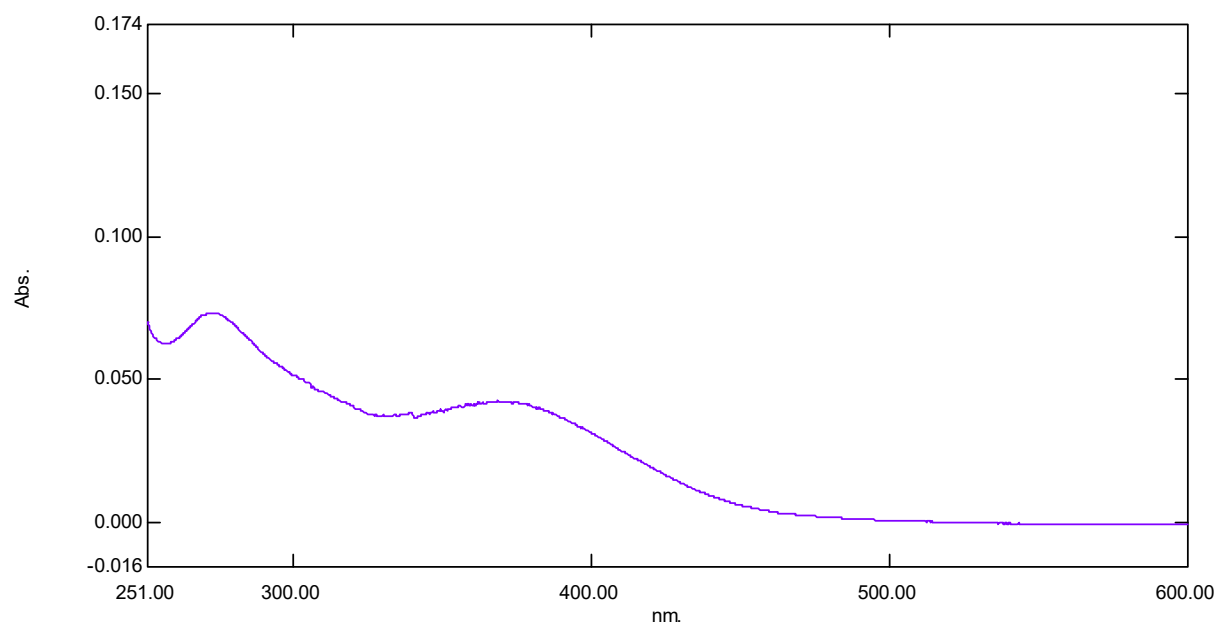

**Figure S3:** UV spectrum of **DMA** in MeOH

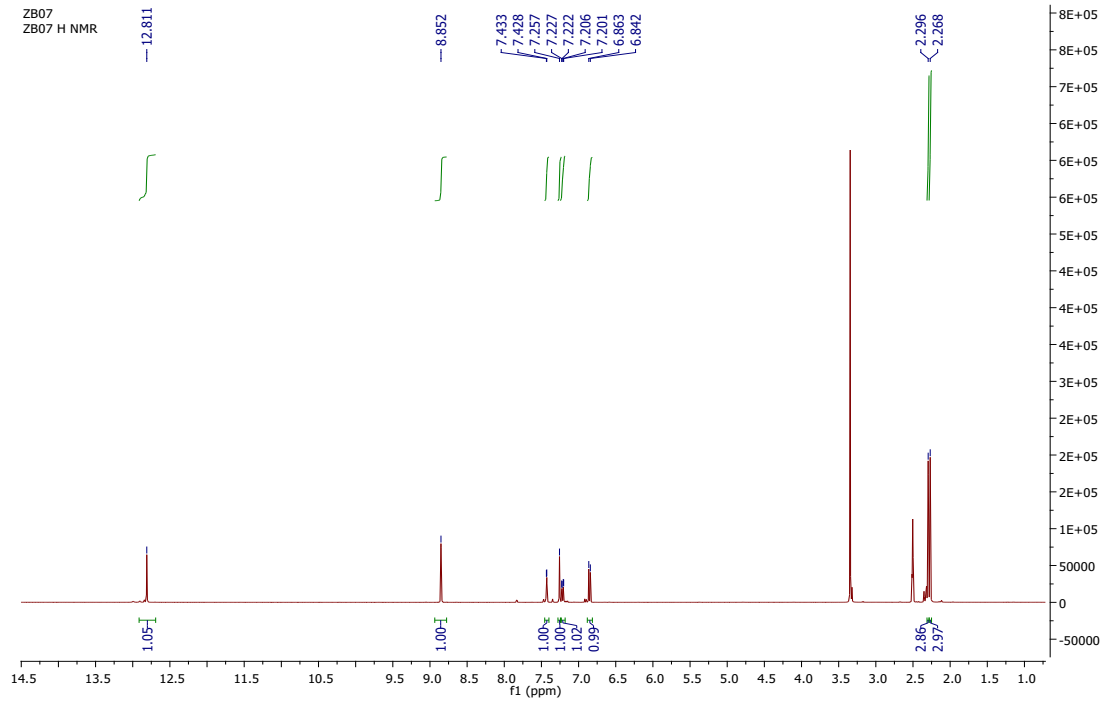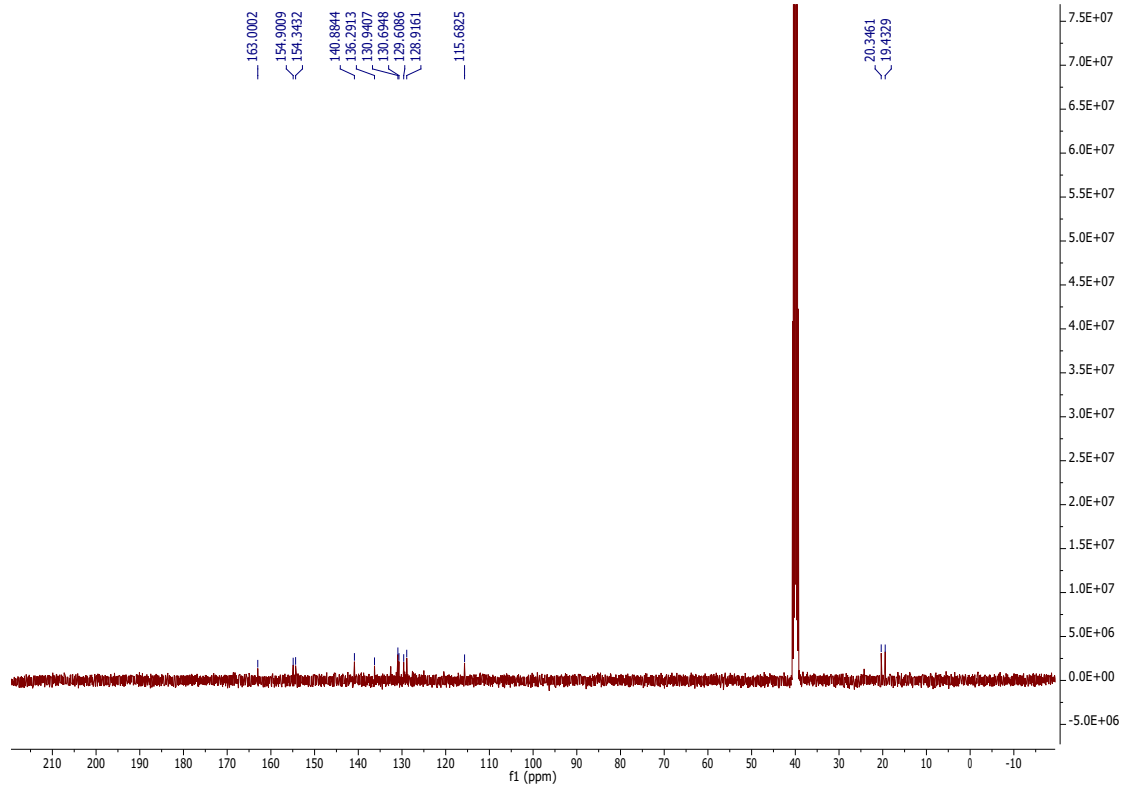

Figure S4:  $^1\text{H}$  &  $^{13}\text{C}$  NMR spectrum of DMM

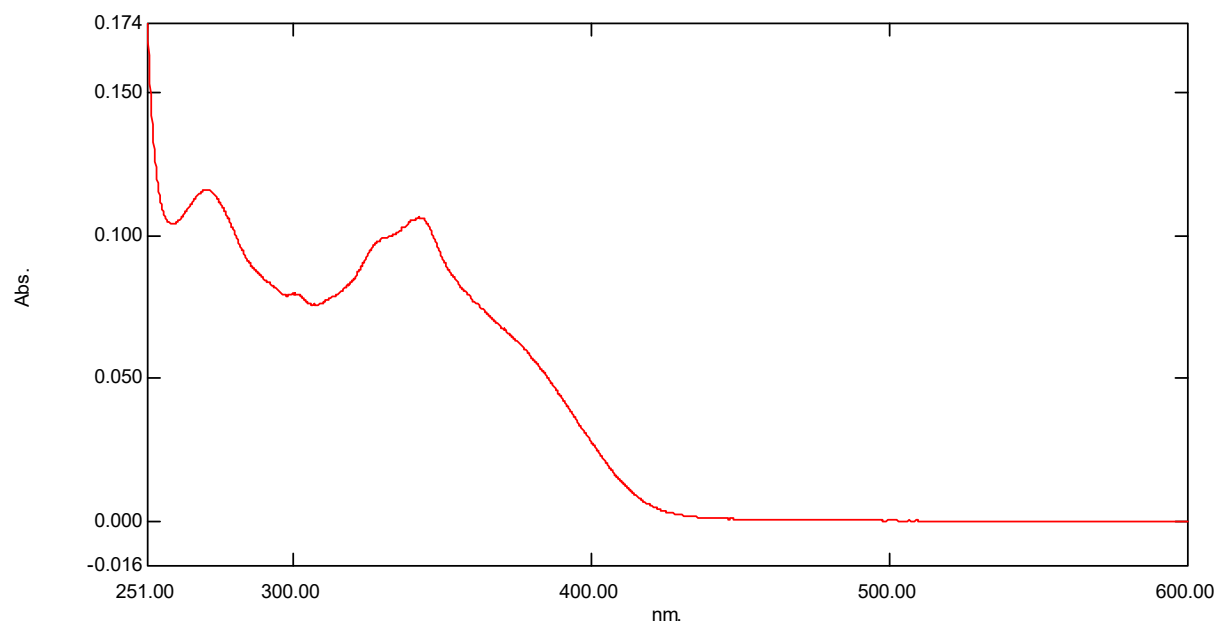

**Figure S5:** UV spectrum of **DMM** in acetonitrile

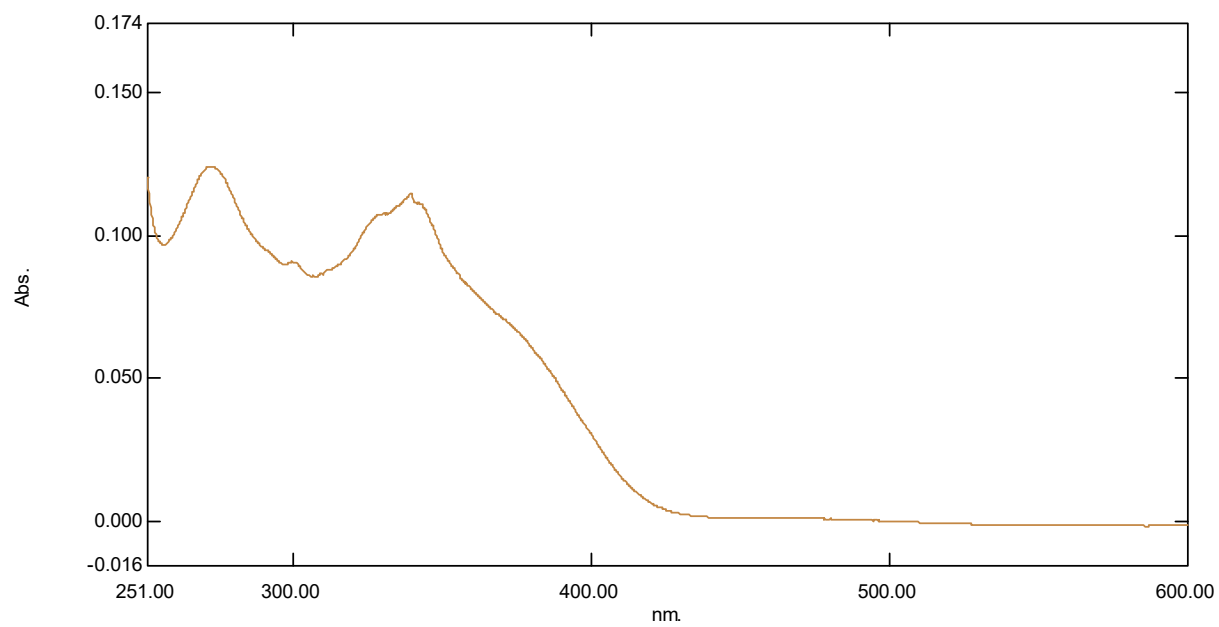

**Figure S6:** UV spectrum of **DMM** in MeOH

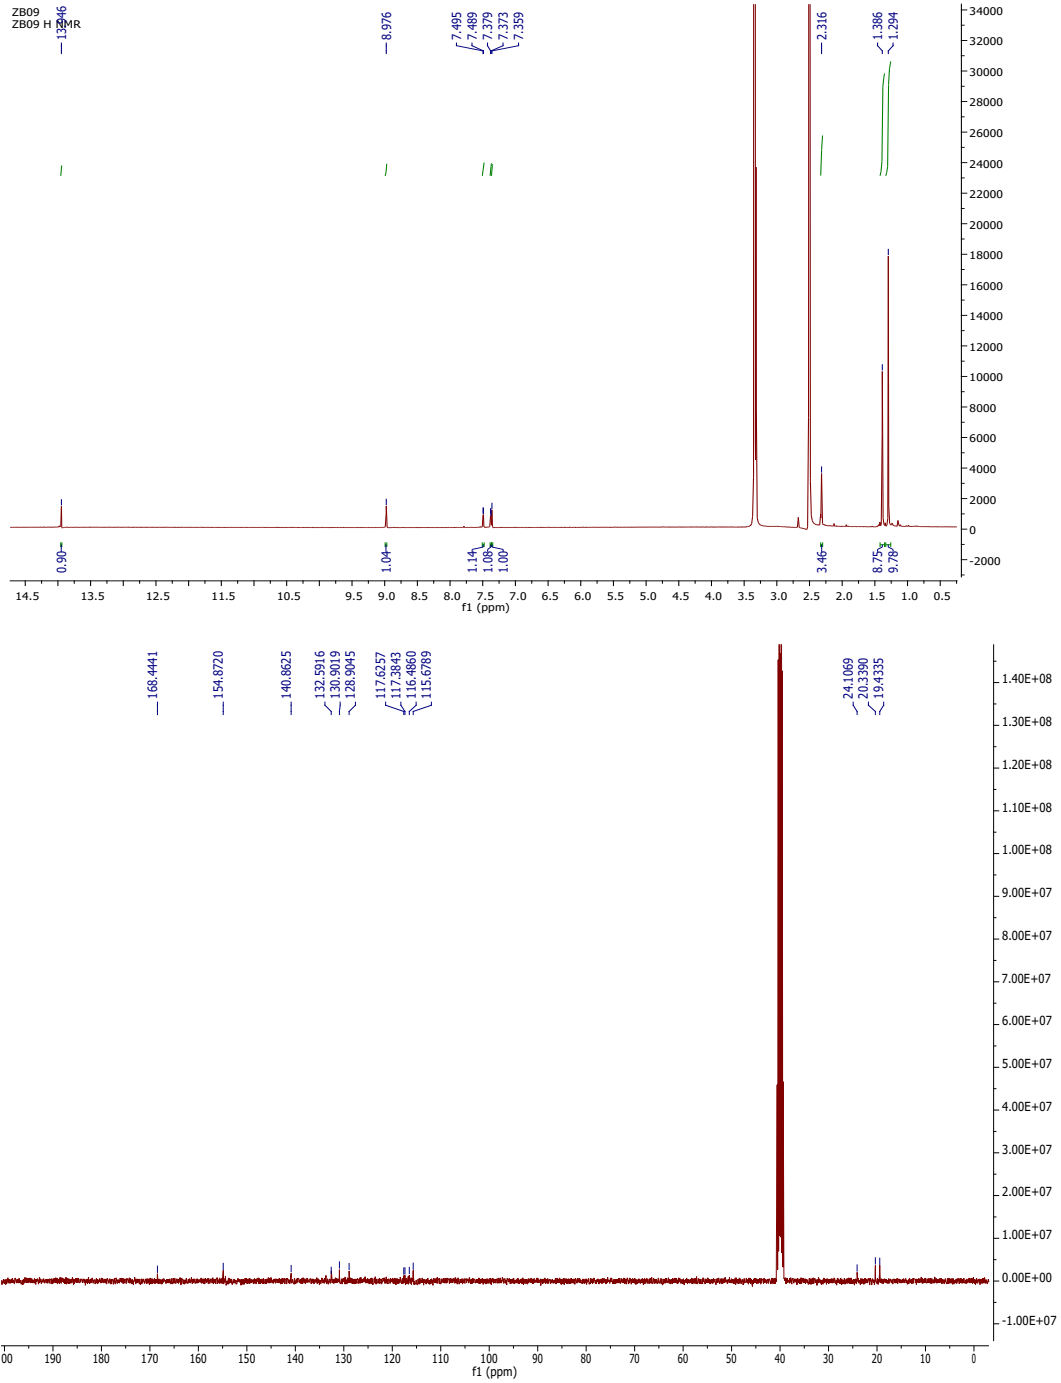

Figure S7: <sup>1</sup>H & <sup>13</sup>C NMR spectrum of DAM

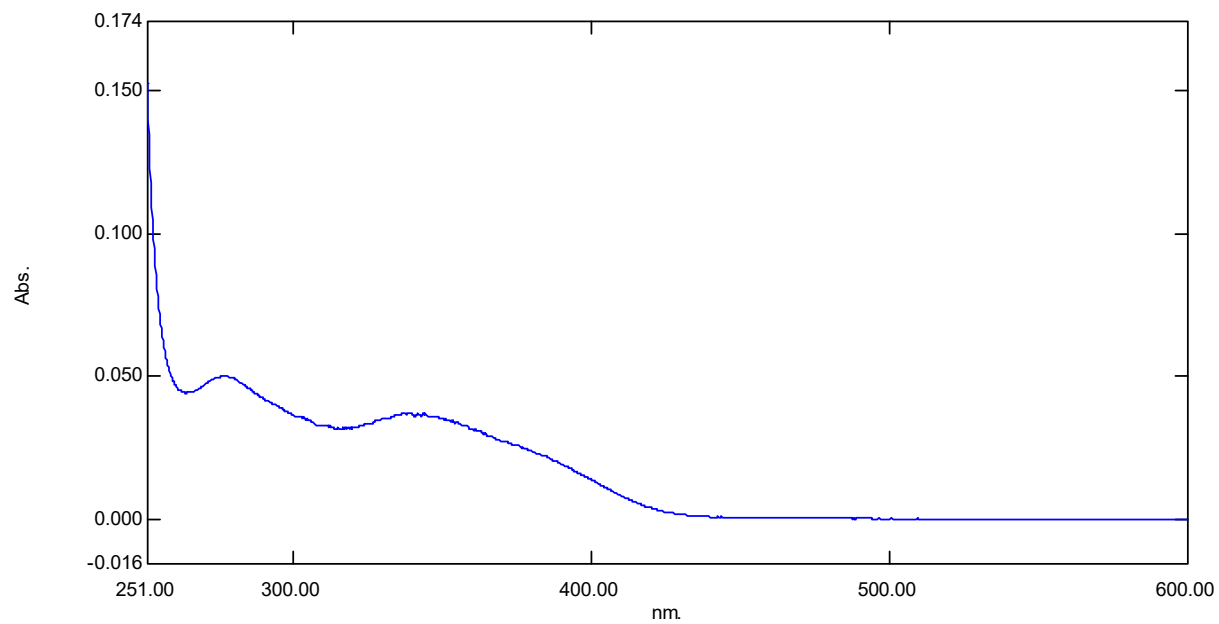

**Figure S8:** UV spectrum of **DMB** in acetonitrile

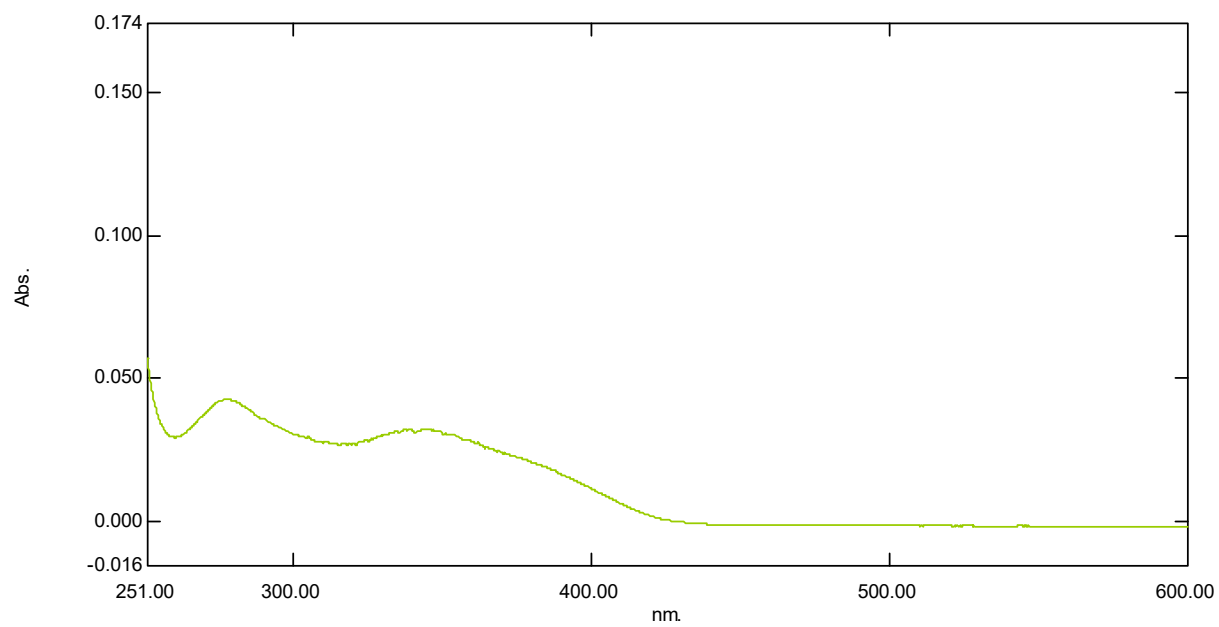

**Figure S9:** UV spectrum of **DMB** in MeOH

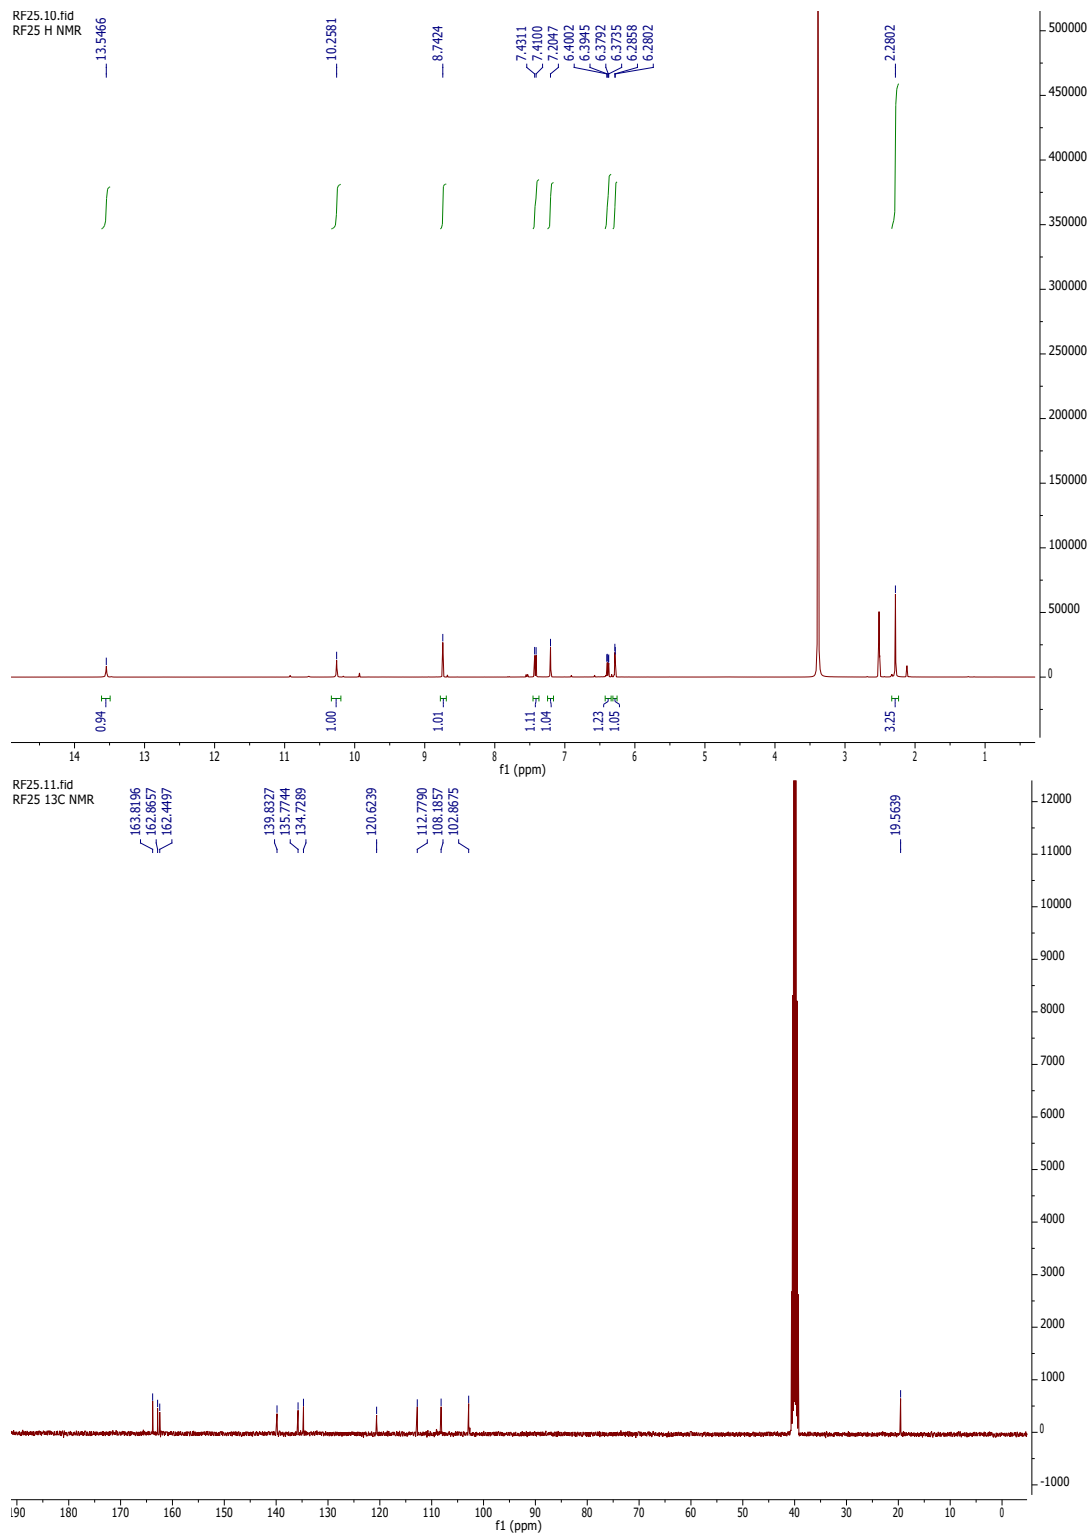

Figure S10:  $^1\text{H}$  &  $^{13}\text{C}$  NMR spectrum of DMD



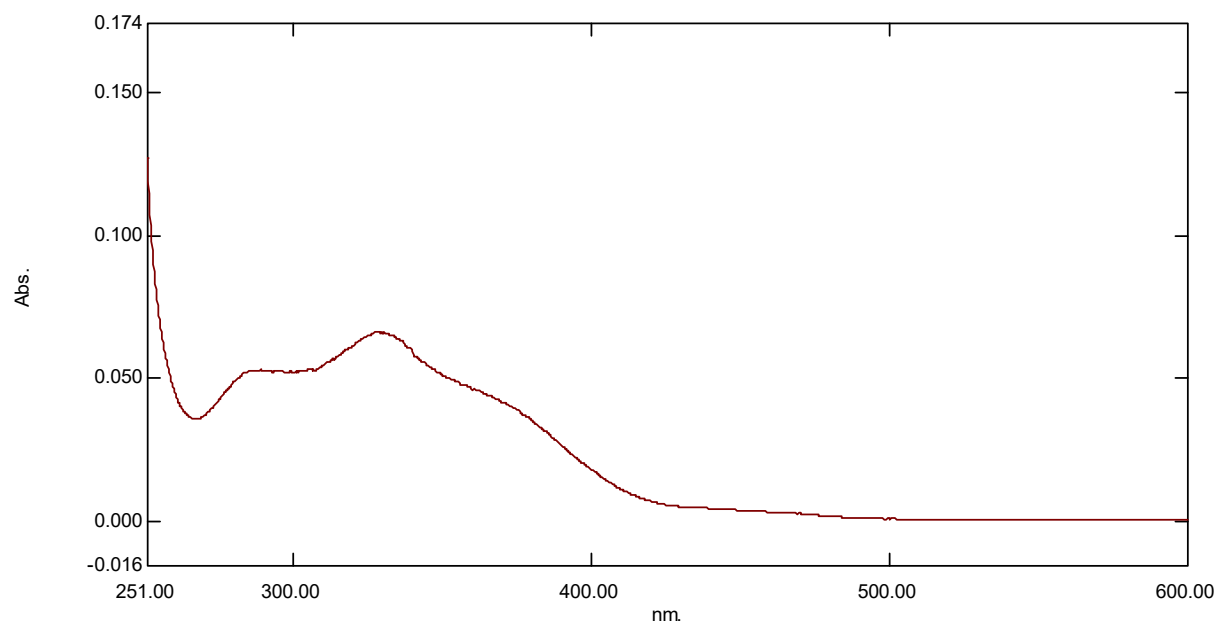

**Figure S11:** UV spectrum of **DMD** in acetonitrile

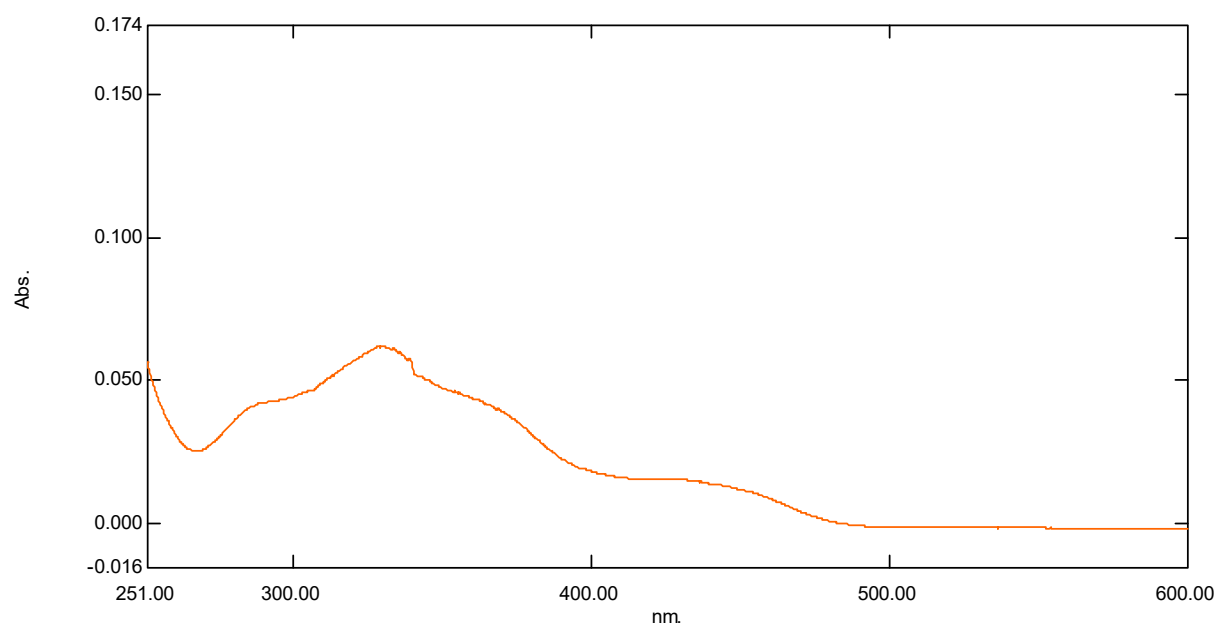

**Figure S12:** UV spectrum of **DMD** in MeOH

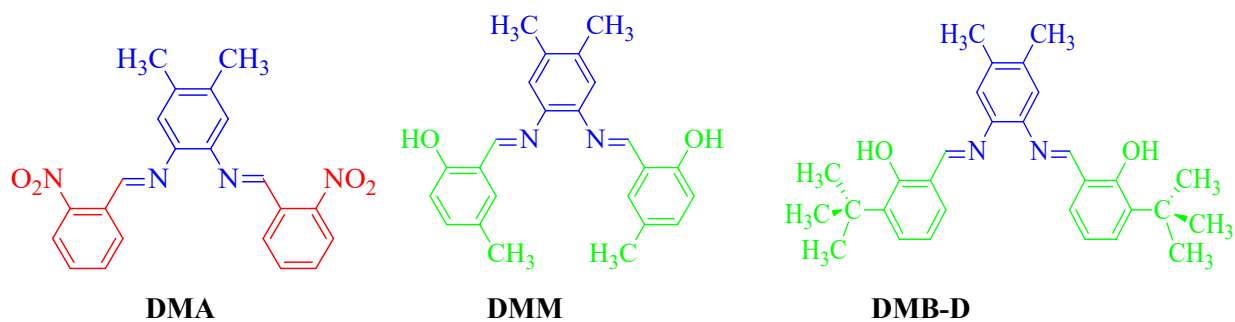

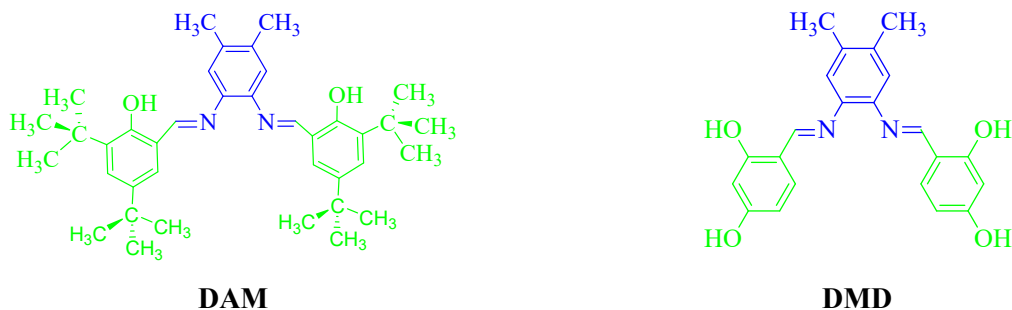

**Figure S13:** Chemical structures of the investigated compounds

**Table S1:** Natural bond orbital (NBO) analysis of **DMA** by using M06-2x/6-311G(d,p)

| Donor( <i>i</i> ) | Type     | Acceptor( <i>j</i> ) | Type       | $E^{(2)}$<br>[kcal/mol] | $E(j)-E(i)$<br>(a.u.) | $F(i,j)$<br>(a.u.) |
|-------------------|----------|----------------------|------------|-------------------------|-----------------------|--------------------|
| C19-C20           | $\sigma$ | C24-N43              | $\sigma^*$ | 5.89                    | 1.11                  | 0.073              |
| C23-C24           | $\sigma$ | C19-C24              | $\sigma^*$ | 5.83                    | 1.42                  | 0.081              |
| C32-H36           | $\sigma$ | C28-C33              | $\sigma^*$ | 5.03                    | 1.21                  | 0.070              |
| C19-C24           | $\sigma$ | C23-C24              | $\sigma^*$ | 4.99                    | 1.43                  | 0.075              |
| C29-C30           | $\sigma$ | C28-N46              | $\sigma^*$ | 4.85                    | 1.12                  | 0.067              |
| C21-H41           | $\sigma$ | C19-C20              | $\sigma^*$ | 4.59                    | 1.21                  | 0.067              |
| C1-C2             | $\sigma$ | C1-C6                | $\sigma^*$ | 4.29                    | 1.41                  | 0.070              |
| C22-H26           | $\sigma$ | C20-C21              | $\sigma^*$ | 3.99                    | 1.24                  | 0.063              |
| C2-C3             | $\sigma$ | C1-C2                | $\sigma^*$ | 3.78                    | 1.43                  | 0.066              |
| C23-C24           | $\sigma$ | C19-C37              | $\sigma^*$ | 3.53                    | 1.32                  | 0.061              |
| C31-C32           | $\sigma$ | C32-C33              | $\sigma^*$ | 3.11                    | 1.41                  | 0.059              |
| C19-C37           | $\sigma$ | C19-C20              | $\sigma^*$ | 2.88                    | 1.36                  | 0.056              |
| C29-C30           | $\sigma$ | C31-H42              | $\sigma^*$ | 2.45                    | 1.35                  | 0.052              |
| C4-N17            | $\sigma$ | C2-C3                | $\sigma^*$ | 2.21                    | 1.48                  | 0.051              |
| C1-C2             | $\sigma$ | C1-C13               | $\sigma^*$ | 1.97                    | 1.26                  | 0.045              |
| C33-C38           | $\sigma$ | N18-C38              | $\sigma^*$ | 1.55                    | 1.44                  | 0.042              |
| C28-C33           | $\sigma$ | C28-N46              | $\sigma^*$ | 0.53                    | 1.14                  | 0.022              |
| C21-C22           | $\pi$    | C23-C24              | $\pi^*$    | 34.52                   | 0.34                  | 0.097              |
| C1-C2             | $\pi$    | C5-C6                | $\pi^*$    | 27.73                   | 0.36                  | 0.090              |
| C19-C20           | $\pi$    | N17-C37              | $\pi^*$    | 12.37                   | 0.38                  | 0.066              |
| C3-C4             | $\pi$    | N18-C38              | $\pi^*$    | 8.33                    | 0.36                  | 0.053              |
| N46-O48           | $\pi$    | C28-C29              | $\pi^*$    | 2.90                    | 0.59                  | 0.041              |
| O44               | LP(3)    | N43-O45              | $\pi^*$    | 214.63                  | 0.22                  | 0.197              |
| O45               | LP(2)    | N43-O44              | $\sigma^*$ | 23.14                   | 0.88                  | 0.128              |
| O48               | LP(2)    | C28-N46              | $\sigma^*$ | 15.50                   | 0.71                  | 0.094              |
| O44               | LP(3)    | N43-O44              | $\sigma^*$ | 6.18                    | 0.82                  | 0.073              |
| O47               | LP(2)    | C28-C29              | $\sigma^*$ | 0.65                    | 1.00                  | 0.023              |

**Table S2:** Natural bond orbital (NBO) analysis of **DMM** by using M06-2x/6-311G(d,p)

| Donor( <i>i</i> ) | Type     | Acceptor( <i>j</i> ) | Type       | $E^{(2)}$<br>[kcal/mol] | $E(j)-E(i)$<br>(a.u.) | $F(i,j)$<br>(a.u.) |
|-------------------|----------|----------------------|------------|-------------------------|-----------------------|--------------------|
| O47-H48           | $\sigma$ | C28-C33              | $\sigma^*$ | 5.72                    | 1.46                  | 0.082              |
| C32-H36           | $\sigma$ | C28-C33              | $\sigma^*$ | 5.08                    | 1.21                  | 0.07               |
| C5-H8             | $\sigma$ | C3-C4                | $\sigma^*$ | 4.95                    | 1.21                  | 0.069              |
| C5-H8             | $\sigma$ | C1-C6                | $\sigma^*$ | 4.61                    | 1.23                  | 0.067              |
| C13-H16           | $\sigma$ | C1-C6                | $\sigma^*$ | 4.49                    | 1.22                  | 0.066              |
| C30-H35           | $\sigma$ | C28-C29              | $\sigma^*$ | 4.35                    | 1.22                  | 0.065              |
| C5-C6             | $\sigma$ | C4-N17               | $\sigma^*$ | 4.19                    | 1.28                  | 0.066              |
| C19-C24           | $\sigma$ | C19-C20              | $\sigma^*$ | 4.06                    | 1.43                  | 0.068              |
| C30-C31           | $\sigma$ | C31-C32              | $\sigma^*$ | 3.84                    | 1.43                  | 0.066              |
| C28-C33           | $\sigma$ | C28-C29              | $\sigma^*$ | 3.54                    | 1.41                  | 0.063              |
| C21-C37           | $\sigma$ | C22-C23              | $\sigma^*$ | 2.68                    | 1.34                  | 0.053              |
| C28-C29           | $\sigma$ | C29-C30              | $\sigma^*$ | 3.21                    | 1.44                  | 0.061              |
| C32-C33           | $\sigma$ | C33-C50              | $\sigma^*$ | 2.88                    | 1.31                  | 0.055              |
| C19-C24           | $\sigma$ | O45-H46              | $\sigma^*$ | 2.17                    | 1.33                  | 0.048              |
| C4-N17            | $\sigma$ | C4-C5                | $\sigma^*$ | 1.86                    | 1.49                  | 0.047              |
| C5-H8             | $\sigma$ | C4-C5                | $\sigma^*$ | 1.23                    | 1.23                  | 0.035              |
| N17-C49           | $\sigma$ | C49-H51              | $\sigma^*$ | 0.84                    | 1.5                   | 0.032              |
| C5-H8             | $\sigma$ | C4-N17               | $\sigma^*$ | 0.53                    | 1.1                   | 0.022              |
| C20-C21           | $\pi$    | C22-C23              | $\pi^*$    | 32.9                    | 0.35                  | 0.096              |
| C1-C6             | $\pi$    | C2-C3                | $\pi^*$    | 29.84                   | 0.35                  | 0.091              |
| C20-C21           | $\pi$    | C19-C24              | $\pi^*$    | 25.41                   | 0.34                  | 0.085              |
| C19-C24           | $\pi$    | N17-C49              | $\pi^*$    | 19.33                   | 0.38                  | 0.082              |
| N17-C49           | $\pi$    | C19-C24              | $\pi^*$    | 8.23                    | 0.45                  | 0.06               |
| O45               | LP(2)    | C19-C24              | $\pi^*$    | 33.66                   | 0.46                  | 0.12               |
| N17               | LP(1)    | C49-H51              | $\sigma^*$ | 14.33                   | 0.93                  | 0.105              |
| N18               | LP(1)    | C2-C3                | $\pi^*$    | 8.29                    | 0.48                  | 0.061              |
| N18               | LP(1)    | C2-C3                | $\sigma^*$ | 5.89                    | 1.05                  | 0.072              |
| O45               | LP(1)    | C19-C24              | $\sigma^*$ | 0.55                    | 1.31                  | 0.024              |

**Table S3:** Natural bond orbital (NBO) analysis of **DMB-D** by using M06-2x/6-311G(d,p)

| Donor( <i>i</i> ) | Type     | Acceptor( <i>j</i> ) | Type       | $E^{(2)}$<br>[kcal/mol] | $E(j)-E(i)$<br>(a.u.) | $F(i,j)$<br>(a.u.) |
|-------------------|----------|----------------------|------------|-------------------------|-----------------------|--------------------|
| C20-H25           | $\sigma$ | C19-C24              | $\sigma^*$ | 5.06                    | 1.21                  | 0.07               |
| C3-N18            | $\sigma$ | C32-C38              | $\sigma^*$ | 4.80                    | 1.38                  | 0.073              |
| C5-H8             | $\sigma$ | C1-C6                | $\sigma^*$ | 4.58                    | 1.23                  | 0.067              |
| C23-C24           | $\sigma$ | C19-C24              | $\sigma^*$ | 4.17                    | 1.4                   | 0.068              |
| C52-H55           | $\sigma$ | C23-C43              | $\sigma^*$ | 3.99                    | 1.02                  | 0.057              |
| C3-C4             | $\sigma$ | C4-C5                | $\sigma^*$ | 3.76                    | 1.41                  | 0.065              |
| C44-H46           | $\sigma$ | C23-C43              | $\sigma^*$ | 3.59                    | 1.02                  | 0.054              |
| C28-C29           | $\sigma$ | C28-C56              | $\sigma^*$ | 3.21                    | 1.24                  | 0.056              |
| C20-C21           | $\sigma$ | C21-C22              | $\sigma^*$ | 2.96                    | 1.42                  | 0.058              |
| C27-C28           | $\sigma$ | C28-C56              | $\sigma^*$ | 2.63                    | 1.24                  | 0.051              |
| C3-C4             | $\sigma$ | C2-H7                | $\sigma^*$ | 2.31                    | 1.32                  | 0.049              |
| C9-H11            | $\sigma$ | C5-C6                | $\sigma^*$ | 2.02                    | 1.22                  | 0.044              |
| N17-C37           | $\sigma$ | C19-C24              | $\sigma^*$ | 1.87                    | 1.59                  | 0.049              |
| C21-C22           | $\sigma$ | C22-H26              | $\sigma^*$ | 1.48                    | 1.33                  | 0.04               |
| C43-C44           | $\sigma$ | C43-C52              | $\sigma^*$ | 1.02                    | 1.09                  | 0.03               |

|         |          |         |            |       |      |       |
|---------|----------|---------|------------|-------|------|-------|
| C22-C23 | $\sigma$ | C43-C48 | $\sigma^*$ | 0.51  | 1.21 | 0.022 |
| C28-C29 | $\pi$    | C27-C32 | $\pi^*$    | 30.73 | 0.35 | 0.094 |
| C2-C3   | $\pi$    | C4-C5   | $\pi^*$    | 26.39 | 0.36 | 0.088 |
| C27-C32 | $\pi$    | N18-C38 | $\pi^*$    | 20.44 | 0.38 | 0.083 |
| N18-C38 | $\pi$    | C2-C3   | $\pi^*$    | 9.53  | 0.46 | 0.065 |
| N17-C37 | $\pi$    | C19-C24 | $\pi^*$    | 7.8   | 0.45 | 0.058 |
| C19-C24 | $\pi$    | C19-C24 | $\pi^*$    | 1.29  | 0.36 | 0.019 |
| O35     | LP(2)    | C19-C24 | $\pi^*$    | 29.12 | 0.46 | 0.112 |
| N17     | LP(1)    | C37-H39 | $\sigma^*$ | 14.52 | 0.91 | 0.104 |
| N18     | LP(1)    | C2-C3   | $\pi^*$    | 8.05  | 0.48 | 0.06  |
| N18     | LP(1)    | C2-C3   | $\sigma^*$ | 5.86  | 1.05 | 0.072 |
| O36     | LP(2)    | C27-C32 | $\sigma^*$ | 0.55  | 1.02 | 0.022 |
| O36     | LP(1)    | C27-C28 | $\sigma^*$ | 0.5   | 1.29 | 0.023 |

**Table S4:** Natural bond orbital (NBO) analysis of **DMD** by using M06-2x/6-311G(d,p)

| Donor( <i>i</i> ) | Type     | Acceptor( <i>j</i> ) | Type       | $E^{(2)}$<br>[kcal/mol] | $E(j)-E(i)$<br>(a.u.) | $F(i,j)$<br>(a.u.) |
|-------------------|----------|----------------------|------------|-------------------------|-----------------------|--------------------|
| O37-H38           | $\sigma$ | C27-C32              | $\sigma^*$ | 5.62                    | 1.46                  | 0.081              |
| O47-H48           | $\sigma$ | C29-C30              | $\sigma^*$ | 5.55                    | 1.45                  | 0.08               |
| C31-H34           | $\sigma$ | C27-C32              | $\sigma^*$ | 5.06                    | 1.21                  | 0.07               |
| C21-H44           | $\sigma$ | C22-C23              | $\sigma^*$ | 4.82                    | 1.21                  | 0.068              |
| C23-H26           | $\sigma$ | C21-C22              | $\sigma^*$ | 4.51                    | 1.22                  | 0.066              |
| C23-C24           | $\sigma$ | C22-O45              | $\sigma^*$ | 4.47                    | 1.23                  | 0.066              |
| C21-H44           | $\sigma$ | C19-C20              | $\sigma^*$ | 4.30                    | 1.22                  | 0.065              |
| C20-C21           | $\sigma$ | C22-O45              | $\sigma^*$ | 4.18                    | 1.21                  | 0.064              |
| C2-C3             | $\sigma$ | C1-C2                | $\sigma^*$ | 3.87                    | 1.43                  | 0.066              |
| C5-C6             | $\sigma$ | C1-C13               | $\sigma^*$ | 3.68                    | 1.25                  | 0.061              |
| C20-C21           | $\sigma$ | C19-C39              | $\sigma^*$ | 3.48                    | 1.33                  | 0.061              |
| C23-C24           | $\sigma$ | C22-C23              | $\sigma^*$ | 3.27                    | 1.42                  | 0.061              |
| C19-C39           | $\sigma$ | C23-C24              | $\sigma^*$ | 2.98                    | 1.36                  | 0.057              |
| C1-C13            | $\sigma$ | C1-C6                | $\sigma^*$ | 2.69                    | 1.34                  | 0.054              |
| C19-C24           | $\sigma$ | C23-H26              | $\sigma^*$ | 2.31                    | 1.32                  | 0.049              |
| C13-H15           | $\sigma$ | C1-C2                | $\sigma^*$ | 1.98                    | 1.22                  | 0.044              |
| C19-C20           | $\sigma$ | C39-H41              | $\sigma^*$ | 1.47                    | 1.29                  | 0.039              |
| C2-H7             | $\sigma$ | C3-N18               | $\sigma^*$ | 0.52                    | 1.1                   | 0.021              |
| C22-C23           | $\pi$    | C19-C24              | $\pi^*$    | 36.31                   | 0.36                  | 0.105              |
| C19-C24           | $\pi$    | C20-C21              | $\pi^*$    | 33.6                    | 0.37                  | 0.101              |
| C2-C3             | $\pi$    | C1-C6                | $\pi^*$    | 28.13                   | 0.37                  | 0.092              |
| C27-C32           | $\pi$    | N18-C40              | $\pi^*$    | 21.48                   | 0.38                  | 0.086              |
| C28-C29           | $\pi$    | C30-C31              | $\pi^*$    | 18.13                   | 0.38                  | 0.074              |
| N17-C39           | $\pi$    | C19-C24              | $\pi^*$    | 7.97                    | 0.44                  | 0.058              |
| C30-C31           | $\pi$    | C30-C31              | $\pi^*$    | 0.52                    | 0.37                  | 0.012              |
| O45               | LP(2)    | C22-C23              | $\pi^*$    | 38.03                   | 0.45                  | 0.125              |
| O35               | LP(2)    | C19-C24              | $\pi^*$    | 35.46                   | 0.45                  | 0.123              |
| N17               | LP(1)    | C39-H41              | $\sigma^*$ | 14.22                   | 0.93                  | 0.104              |
| N18               | LP(1)    | C2-C3                | $\pi^*$    | 7.66                    | 0.48                  | 0.058              |
| O45               | LP(1)    | C21-C22              | $\sigma^*$ | 0.55                    | 1.3                   | 0.024              |

**Table S5:** Wave length, excitation energy and oscillator strength of investigated compound **DMA**

| NO. | DFT<br>$\lambda$ (nm) | $E(eV)$ | $f_{os}$ | MO contributions                                                                                                                                                                                                                                                                         |
|-----|-----------------------|---------|----------|------------------------------------------------------------------------------------------------------------------------------------------------------------------------------------------------------------------------------------------------------------------------------------------|
| 1   | 364.068               | 3.405   | 0.254    | H $\rightarrow$ L (67%), H $\rightarrow$ L+2 (15%), H-6 $\rightarrow$ L (3%), H-1 $\rightarrow$ L+1 (2%)                                                                                                                                                                                 |
| 2   | 328.137               | 3.778   | 0.218    | H $\rightarrow$ L+1 (58%), H $\rightarrow$ L+3 (13%), H-7 $\rightarrow$ L (5%), H-6 $\rightarrow$ L+1 (2%), H-1 $\rightarrow$ L (6%)                                                                                                                                                     |
| 3   | 312.057               | 3.973   | 0.034    | H-13 $\rightarrow$ L+1 (14%), H-12 $\rightarrow$ L (18%), H-9 $\rightarrow$ L+1 (14%), H-12 $\rightarrow$ L+2 (7%), H-8 $\rightarrow$ L (6%), H-8 $\rightarrow$ L+2 (2%), H-5 $\rightarrow$ L+1 (7%), H-4 $\rightarrow$ L (5%), H-2 $\rightarrow$ L (2%)                                 |
| 4   | 311.273               | 3.983   | 0.002    | H-13 $\rightarrow$ L (12%), H-12 $\rightarrow$ L+1 (23%), H-9 $\rightarrow$ L (11%), H-13 $\rightarrow$ L+2 (4%), H-12 $\rightarrow$ L+3 (2%), H-12 $\rightarrow$ L+6 (3%), H-9 $\rightarrow$ L+2 (4%), H-8 $\rightarrow$ L+1 (7%), H-5 $\rightarrow$ L (6%), H-4 $\rightarrow$ L+1 (5%) |
| 5   | 284.875               | 4.352   | 0.118    | H-2 $\rightarrow$ L (20%), H $\rightarrow$ L (18%), H $\rightarrow$ L+2 (30%), H-7 $\rightarrow$ L+3 (3%), H-6 $\rightarrow$ L+2 (5%), H-3 $\rightarrow$ L+1 (7%), H-1 $\rightarrow$ L+1 (5%)                                                                                            |
| 6   | 280.632               | 4.418   | 0.104    | H-1 $\rightarrow$ L (53%), H-1 $\rightarrow$ L+2 (11%) H-14 $\rightarrow$ L+1 (3%), H-13 $\rightarrow$ L (3%), H $\rightarrow$ L+1 (6%), H $\rightarrow$ L+4 (3%)                                                                                                                        |

**Table S6:** Wave length, excitation energy and oscillator strength of investigated compound **DMM**

| NO. | DFT<br>$\lambda$ (nm) | $E(eV)$ | $f_{os}$ | MO contributions                                                                                                                                                                                                                               |
|-----|-----------------------|---------|----------|------------------------------------------------------------------------------------------------------------------------------------------------------------------------------------------------------------------------------------------------|
| 1   | 346.196               | 3.581   | 0.286    | H $\rightarrow$ L (77%), H-7 $\rightarrow$ L+1 (3%), H-6 $\rightarrow$ L (5%), H-4 $\rightarrow$ L (2%), H-2 $\rightarrow$ L (3%), H-1 $\rightarrow$ L+1 (3%)                                                                                  |
| 2   | 307.887               | 4.027   | 0.364    | H $\rightarrow$ L+1 (60%) H-7 $\rightarrow$ L (9%), H-6 $\rightarrow$ L+1 (6%), H-4 $\rightarrow$ L+1 (3%), H-3 $\rightarrow$ L (3%), H-1 $\rightarrow$ L (8%)                                                                                 |
| 3   | 287.098               | 4.318   | 0.386    | H-2 $\rightarrow$ L (51%), H-1 $\rightarrow$ L+1 (18%) H-7 $\rightarrow$ L+1 (3%), H-6 $\rightarrow$ L (4%), H-4 $\rightarrow$ L (6%), H-3 $\rightarrow$ L+1 (4%), H $\rightarrow$ L (6%)                                                      |
| 4   | 281.339               | 4.407   | 0.149    | H-2 $\rightarrow$ L+1 (30%), H-1 $\rightarrow$ L (54%) H-7 $\rightarrow$ L (2%), H-3 $\rightarrow$ L (3%)                                                                                                                                      |
| 5   | 266.139               | 4.659   | 0.001    | H-3 $\rightarrow$ L (40%), H $\rightarrow$ L+1 (15%) H-7 $\rightarrow$ L (2%), H-6 $\rightarrow$ L+1 (3%), H-5 $\rightarrow$ L (5%), H-1 $\rightarrow$ L (9%), H $\rightarrow$ L+2 (9%), H $\rightarrow$ L+4 (5%)                              |
| 6   | 257.939               | 4.807   | 0.112    | H-4 $\rightarrow$ L (42%) H-7 $\rightarrow$ L+1 (5%), H-6 $\rightarrow$ L (9%), H-5 $\rightarrow$ L+1 (9%), H-3 $\rightarrow$ L+1 (4%), H-2 $\rightarrow$ L (6%), H-1 $\rightarrow$ L+1 (7%), H $\rightarrow$ L (7%), H $\rightarrow$ L+3 (2%) |

**Table S7:** Wave length, excitation energy and oscillator strength of investigated compound **DMB-D**

| NO. | DFT<br>$\lambda$ (nm) | $E(eV)$ | $f_{os}$ | MO contributions                                                                                                                                                                                                       |
|-----|-----------------------|---------|----------|------------------------------------------------------------------------------------------------------------------------------------------------------------------------------------------------------------------------|
| 1   | 347.811               | 3.564   | 0.352    | H $\rightarrow$ L (79%), H-7 $\rightarrow$ L+1 (3%), H-6 $\rightarrow$ L (5%), H $\rightarrow$ L (3%), H-1 $\rightarrow$ L+1 (3%)                                                                                      |
| 2   | 308.810               | 4.014   | 0.337    | H $\rightarrow$ L+1 (61%), H-7 $\rightarrow$ L (9%), H-6 $\rightarrow$ L+1 (6%), H-4 $\rightarrow$ L+1 (4%), H-3 $\rightarrow$ L (2%), H-1 $\rightarrow$ L (7%)                                                        |
| 3   | 283.976               | 4.366   | 0.495    | H-4 $\rightarrow$ L (13%), H-2 $\rightarrow$ L (43%), H-1 $\rightarrow$ L+1 (16%) H-7 $\rightarrow$ L+1 (3%), H-6 $\rightarrow$ L (6%), H-5 $\rightarrow$ L+1 (3%), H-3 $\rightarrow$ L+1 (3%), H $\rightarrow$ L (5%) |
| 4   | 278.609               | 4.450   | 0.124    | H-2 $\rightarrow$ L+1 (28%), H-1 $\rightarrow$ L (55%), H-3 $\rightarrow$ L (3%)                                                                                                                                       |
| 5   | 267.929               | 4.627   | 0.005    | H-5 $\rightarrow$ L (11%), H-3 $\rightarrow$ L (38%), H $\rightarrow$ L+1 (14%), H-6 $\rightarrow$ L+1 (3%), H-1 $\rightarrow$ L (9%), H $\rightarrow$ L+2 (5%), H $\rightarrow$ L+4 (8%)                              |
| 6   | 262.784               | 4.718   | 0.162    | H-4 $\rightarrow$ L (36%), H-2 $\rightarrow$ L (15%), H-7 $\rightarrow$ L+1 (4%), H-6 $\rightarrow$ L (9%), H-5 $\rightarrow$ L+1 (6%), H-3 $\rightarrow$ L+1 (9%), H-1 $\rightarrow$ L+1 (5%), H $\rightarrow$ L (5%) |

**Table S8:** Wave length, excitation energy and oscillator strength of investigated compound **DAM**

| NO. | DFT<br>$\lambda$ (nm) | $E(eV)$ | $f_{os}$ | MO contributions                                                                                                                                                                                                       |
|-----|-----------------------|---------|----------|------------------------------------------------------------------------------------------------------------------------------------------------------------------------------------------------------------------------|
| 1   | 348.956               | 3.553   | 0.353    | H $\rightarrow$ L (77%), H-7 $\rightarrow$ L+1 (2%), H-6 $\rightarrow$ L (5%), H-4 $\rightarrow$ L (3%), H-2 $\rightarrow$ L (3%), H-1 $\rightarrow$ L+1 (3%)                                                          |
| 2   | 309.542               | 4.005   | 0.389    | H $\rightarrow$ L+1 (59%), H-7 $\rightarrow$ L (7%), H-6 $\rightarrow$ L+1 (5%), H-4 $\rightarrow$ L+1 (4%), H-3 $\rightarrow$ L (2%), H-1 $\rightarrow$ L (9%)                                                        |
| 3   | 290.994               | 4.260   | 0.390    | H-2 $\rightarrow$ L (48%), H-1 $\rightarrow$ L+1 (19%), H-7 $\rightarrow$ L+1 (2%), H-6 $\rightarrow$ L (5%), H-4 $\rightarrow$ L (8%), H $\rightarrow$ L (6%)                                                         |
| 4   | 285.829               | 4.337   | 0.069    | H-2 $\rightarrow$ L+1 (30%), H-1 $\rightarrow$ L (54%), H-7 $\rightarrow$ L (2%), H-3 $\rightarrow$ L (2%)                                                                                                             |
| 5   | 268.364               | 4.620   | 0.017    | H-5 $\rightarrow$ L (11%), H-3 $\rightarrow$ L (42%), H $\rightarrow$ L+1 (14%), H-6 $\rightarrow$ L+1 (2%), H-1 $\rightarrow$ L (7%), H $\rightarrow$ L+2 (8%), H $\rightarrow$ L+4 (3%)                              |
| 6   | 266.083               | 4.659   | 0.182    | H-4 $\rightarrow$ L (42%), H-2 $\rightarrow$ L (11%), H-7 $\rightarrow$ L+1 (4%), H-6 $\rightarrow$ L (9%), H-5 $\rightarrow$ L+1 (7%), H-3 $\rightarrow$ L+1 (7%), H-1 $\rightarrow$ L+1 (5%), H $\rightarrow$ L (5%) |

**Table S9:** Wave length, excitation energy and oscillator strength of investigated compound **DMD**

| NO. | DFT<br>$\lambda$ (nm) | $E(eV)$ | $f_{os}$ | MO contributions                                                                                                                                                                                                                                                             |
|-----|-----------------------|---------|----------|------------------------------------------------------------------------------------------------------------------------------------------------------------------------------------------------------------------------------------------------------------------------------|
| 1   | 341.477               | 3.631   | 0.408    | H $\rightarrow$ L (79%), H-7 $\rightarrow$ L+1 (2%), H-6 $\rightarrow$ L (4%), H-2 $\rightarrow$ L (4%), H-1 $\rightarrow$ L+1 (4%)                                                                                                                                          |
| 2   | 303.256               | 4.088   | 0.524    | H $\rightarrow$ L+1 (62%) H-7 $\rightarrow$ L (8%), H-6 $\rightarrow$ L+1 (5%), H-2 $\rightarrow$ L+1 (5%), H-1 $\rightarrow$ L (9%)                                                                                                                                         |
| 3   | 282.544               | 4.388   | 0.403    | H-6 $\rightarrow$ L (11%), H-2 $\rightarrow$ L (52%), H-1 $\rightarrow$ L+1 (10%) H-7 $\rightarrow$ L+1 (5%), H-3 $\rightarrow$ L+1 (5%), H $\rightarrow$ L (7%)                                                                                                             |
| 4   | 274.221               | 4.521   | 0.418    | H-2 $\rightarrow$ L+1 (21%), H-1 $\rightarrow$ L (64%) H-7 $\rightarrow$ L (3%), H $\rightarrow$ L+3 (3%)                                                                                                                                                                    |
| 5   | 264.227               | 4.692   | 0.059    | H-3 $\rightarrow$ L (31%), H $\rightarrow$ L+1 (16%), H $\rightarrow$ L+4 (10%) H-7 $\rightarrow$ L (7%), H-6 $\rightarrow$ L+1 (7%), H-5 $\rightarrow$ L (5%), H-2 $\rightarrow$ L+1 (6%), H-1 $\rightarrow$ L (4%), H-1 $\rightarrow$ L+2 (2%)                             |
| 6   | 249.759               | 4.964   | 0.051    | H-5 $\rightarrow$ L+1 (11%), H-4 $\rightarrow$ L (32%), H $\rightarrow$ L+2 (11%) H-7 $\rightarrow$ L+1 (3%), H-6 $\rightarrow$ L (6%), H-3 $\rightarrow$ L+1 (5%), H $\rightarrow$ L+2 (4%), H-1 $\rightarrow$ L+1 (7%), H-1 $\rightarrow$ L+3 (8%), H $\rightarrow$ L (4%) |

**Table S10:** Dipole moment along and major contributing tensors of investigated compounds

| Dipole Moment | $\mu_x$ | $\mu_y$ | $\mu_z$             | $\mu_{tot}$ |
|---------------|---------|---------|---------------------|-------------|
| <b>DMA</b>    | 0.000   | -2.385  | $-4 \times 10^{-5}$ | 2.385       |
| <b>DMM</b>    | 0.000   | -0.705  | $-8 \times 10^{-5}$ | 0.705       |
| <b>DMB-D</b>  | -0.000  | 0.882   | $-3 \times 10^{-4}$ | 0.882       |
| <b>DAM</b>    | 0.000   | 0.659   | -0.000              | 0.659       |
| <b>DMD</b>    | 0.000   | -0.202  | $1 \times 10^{-3}$  | 0.202       |

Units in *D***Table S11:** Dipole polarizabilities and major contributing tensors (*e.s.u.*)

| Linear Polarizability | $\alpha_{xx} \times 10^{-25}$ | $\alpha_{yy} \times 10^{-25}$ | $\alpha_{zz} \times 10^{-25}$ | $\langle \alpha \rangle \times 10^{-25}$ |
|-----------------------|-------------------------------|-------------------------------|-------------------------------|------------------------------------------|
| <b>DMA</b>            | 724.537                       | 747.510                       | 213.058                       | 561.702                                  |
| <b>DMM</b>            | 666.537                       | 727.566                       | 304.093                       | 566.066                                  |
| <b>DMB-D</b>          | 845.437                       | 784.062                       | 473.231                       | 700.910                                  |

|            |         |         |         |         |
|------------|---------|---------|---------|---------|
| <b>DAM</b> | 981.133 | 983.541 | 667.640 | 877.438 |
| <b>DMD</b> | 675.571 | 716.639 | 257.379 | 549.863 |

**Table S12:** The computed first hyperpolarizability ( $\beta_{\text{tot}}$ ) and major contributing tensors (*e.s.u.*)

| 1 <sup>st</sup>          |                              |                              |                              |                              |                              |                              |                              |                              |                              |                                     |
|--------------------------|------------------------------|------------------------------|------------------------------|------------------------------|------------------------------|------------------------------|------------------------------|------------------------------|------------------------------|-------------------------------------|
| Hyperpolar-<br>izability | $\beta_{xxx}\times 10^{-33}$ | $\beta_{xxy}\times 10^{-33}$ | $\beta_{xyy}\times 10^{-33}$ | $\beta_{yyy}\times 10^{-33}$ | $\beta_{xxz}\times 10^{-33}$ | $\beta_{yyz}\times 10^{-33}$ | $\beta_{xzz}\times 10^{-33}$ | $\beta_{yzz}\times 10^{-33}$ | $\beta_{zzz}\times 10^{-33}$ | $\beta_{\text{tot}}\times 10^{-33}$ |
| <b>DMA</b>               | -0.388                       | 12747.514                    | -0.120                       | 9565.689                     | -0.086                       | -0.095                       | 0.008                        | -1183.745                    | 0.008                        | 21129.545                           |
| <b>DMM</b>               | 1.529                        | -46.971                      | 1.468                        | -274.701                     | 0.207                        | 0.034                        | -0.155                       | 160.102                      | -0.013                       | 161.594                             |
| <b>DMB-D</b>             | 3.066                        | -23.913                      | 1.641                        | -924.465                     | 0.812                        | 0.120                        | -0.025                       | 6.038                        | -0.215                       | 942.348                             |
| <b>DAM</b>               | -0.440                       | -1120.178                    | 0.224                        | -3391.291                    | -0.233                       | 0.008                        | 0.224                        | 1176.196                     | 0.449                        | 3335.274                            |
| <b>DMD</b>               | -1.304                       | -9867.717                    | 0.129                        | -15952.49                    | 0.112                        | 0.958                        | 0.388                        | 380.946                      | 0.103                        | 25438.874                           |

**Table S13:** 2<sup>nd</sup> Hyper-polarizability and major contributing tensors (*e.s.u.*)

| 2 <sup>nd</sup> Hyperpolarizability | $\gamma_X$ | $\gamma_Y\times 10^{-35}$ | $\gamma_Z\times 10^{-35}$ | $\gamma_{\text{tot}}\times 10^{-35}$ |
|-------------------------------------|------------|---------------------------|---------------------------|--------------------------------------|
| <b>DMA</b>                          | 10.496     | 1.019                     | 0.0651                    | 20.761                               |
| <b>DMM</b>                          | 7.756      | 9.181                     | 0.228                     | 17.170                               |
| <b>DMB-D</b>                        | 9.715      | 8.859                     | 0.774                     | 19.320                               |
| <b>DAM</b>                          | 9.982      | 10.199                    | 10.546                    | 21.239                               |
| <b>DMD</b>                          | 9.645      | 10.577                    | 14.984                    | 20.373                               |

**Table S14:** Percentages of donor,  $\pi$ -spacer and acceptor for HOMO and LUMO of entitled compounds

| Comp.        | LUMO  |               |          | HOMO  |               |          |
|--------------|-------|---------------|----------|-------|---------------|----------|
|              | Donor | $\pi$ -spacer | Acceptor | Donor | $\pi$ -spacer | Acceptor |
| <b>DMA</b>   | ---   | 14.4          | 85.6     | ---   | 81.8          | 18.2     |
| <b>DMM</b>   | 66.6  | 33.4          | ---      | 30.3  | 69.7          | ---      |
| <b>DMB-D</b> | 64.9  | 35.1          | ---      | 28.5  | 71.5          | ---      |
| <b>DAM</b>   | 65.2  | 34.8          | ---      | 34.4  | 65.6          | ---      |
| <b>DMD</b>   | 64.9  | 35.1          | ---      | 37.6  | 62.4          | ---      |
